# Supplementary material for: Highly efficient UV-Vis-infrared catalytic purification of benzene on CeMnxOy/TiO2 nanocomposite, caused by its high thermocatalytic activity and strong absorption in the full solar spectrum region
Source: Royal Society of Chemistry journal article supplement (doi:10.1039/c6ta03181a), 2016-01-01
Supplement: c6ta03181a1.pdf [file c6ta03181a1.pdf]

**Highly Efficient UV-Vis-Infrared Catalytic Purification of Benzene on  $\text{CeMn}_x\text{O}_y/\text{TiO}_2$   
Nanocomposite Caused by its High Thermocatalytic Activity and Strong Absorption in Full Solar  
Spectrum Region**

Huihui Liu, Yuanzhi Li\*, Yi Yang, Mingyang Mao, Min Zeng, Lan Lan, Li Yun, Xiujian Zhao  
State Key Laboratory of Silicate Materials for Architectures (Wuhan University of Technology), 122  
Luoshi Road, Wuhan 430070, P. R. China. Email: liyuanzhi66@hotmail.com

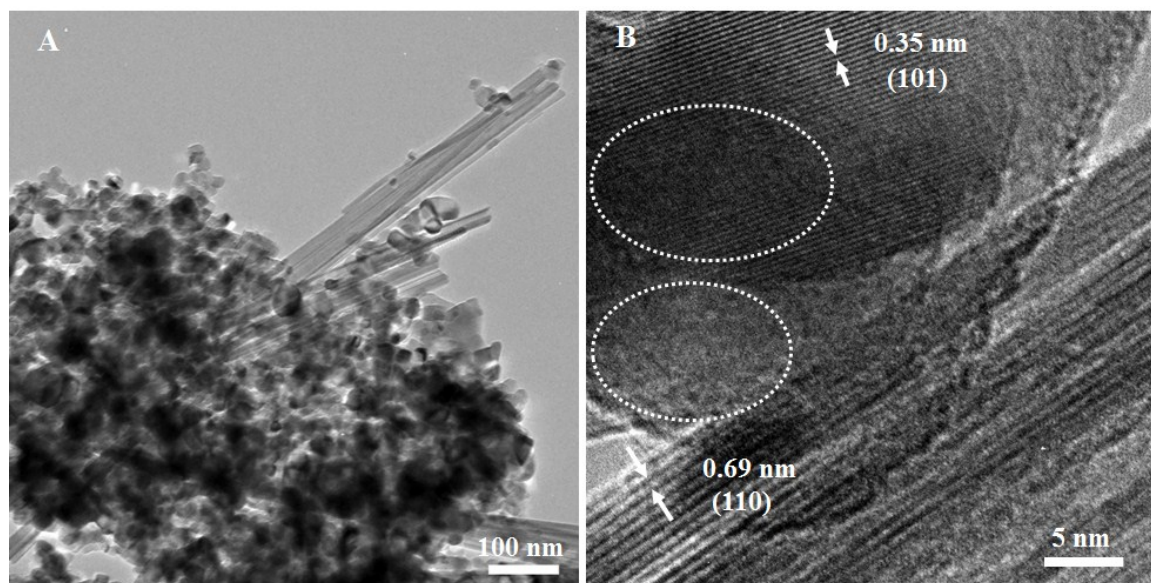

**Figure S1.** TEM (A) and HRTEM (B) images of the  $\text{MnO}_x/\text{TiO}_2$  sample: the obscure area(white dotted circles) in HRTEM (B) indicates amorphous manganese oxide..

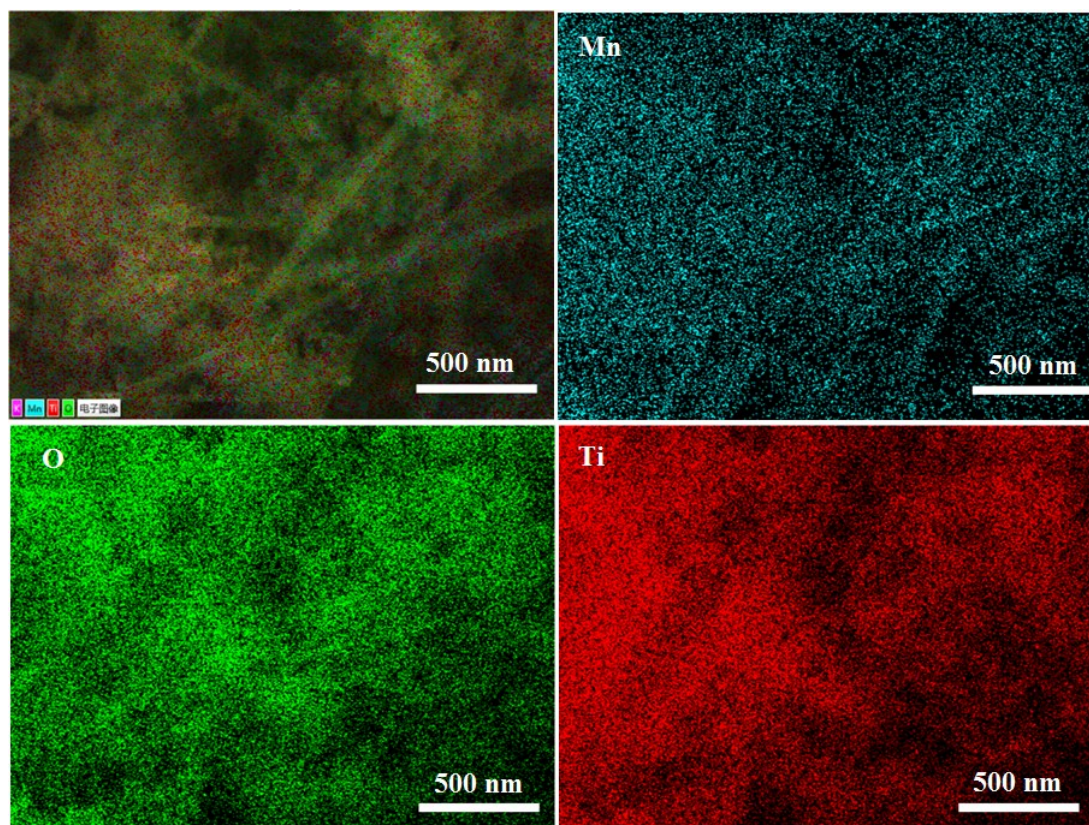

**Figure S2.** EDX element mapping of the  $\text{MnO}_x/\text{TiO}_2$  sample.

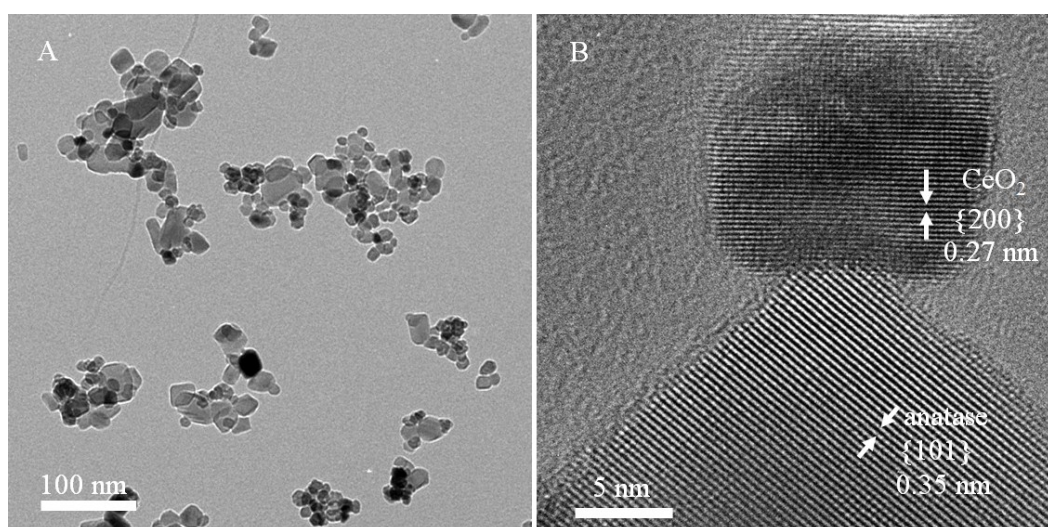

**Figure S3.** TEM (A) and HRTEM (B) images of the  $\text{CeO}_2/\text{TiO}_2$  sample.



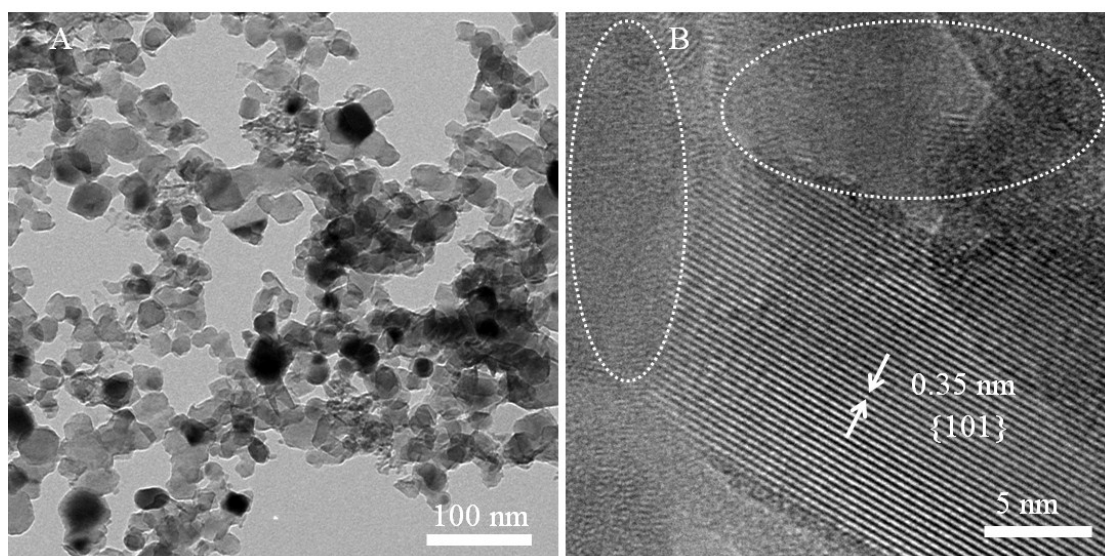

**Figure S4.** TEM (A) and HRTEM (B) images of the used  $\text{CeMn}_x\text{O}_y/\text{TiO}_2$  sample after the catalytic durability test: the obscure area (white dotted circles) in HRTEM (B) indicates amorphous cerium manganese oxide.

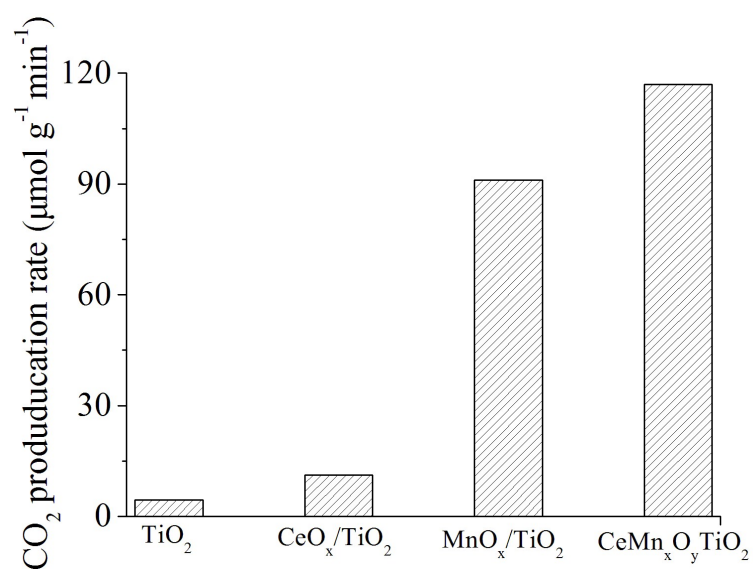

**Figure S5.** The initial  $\text{CO}_2$  production rate of the samples benzene oxidation under the irradiation of the Xe lamp.
